# Supplementary material for: IL-4 and IL-13 Promote Proliferation of Mammary Epithelial Cells through STAT6 and IRS-1
Source: MDPI journal article supplement (doi:10.3390/ijms222112008), 2021-11-05
Supplement: s1 [file s1]

## Supplementary Materials

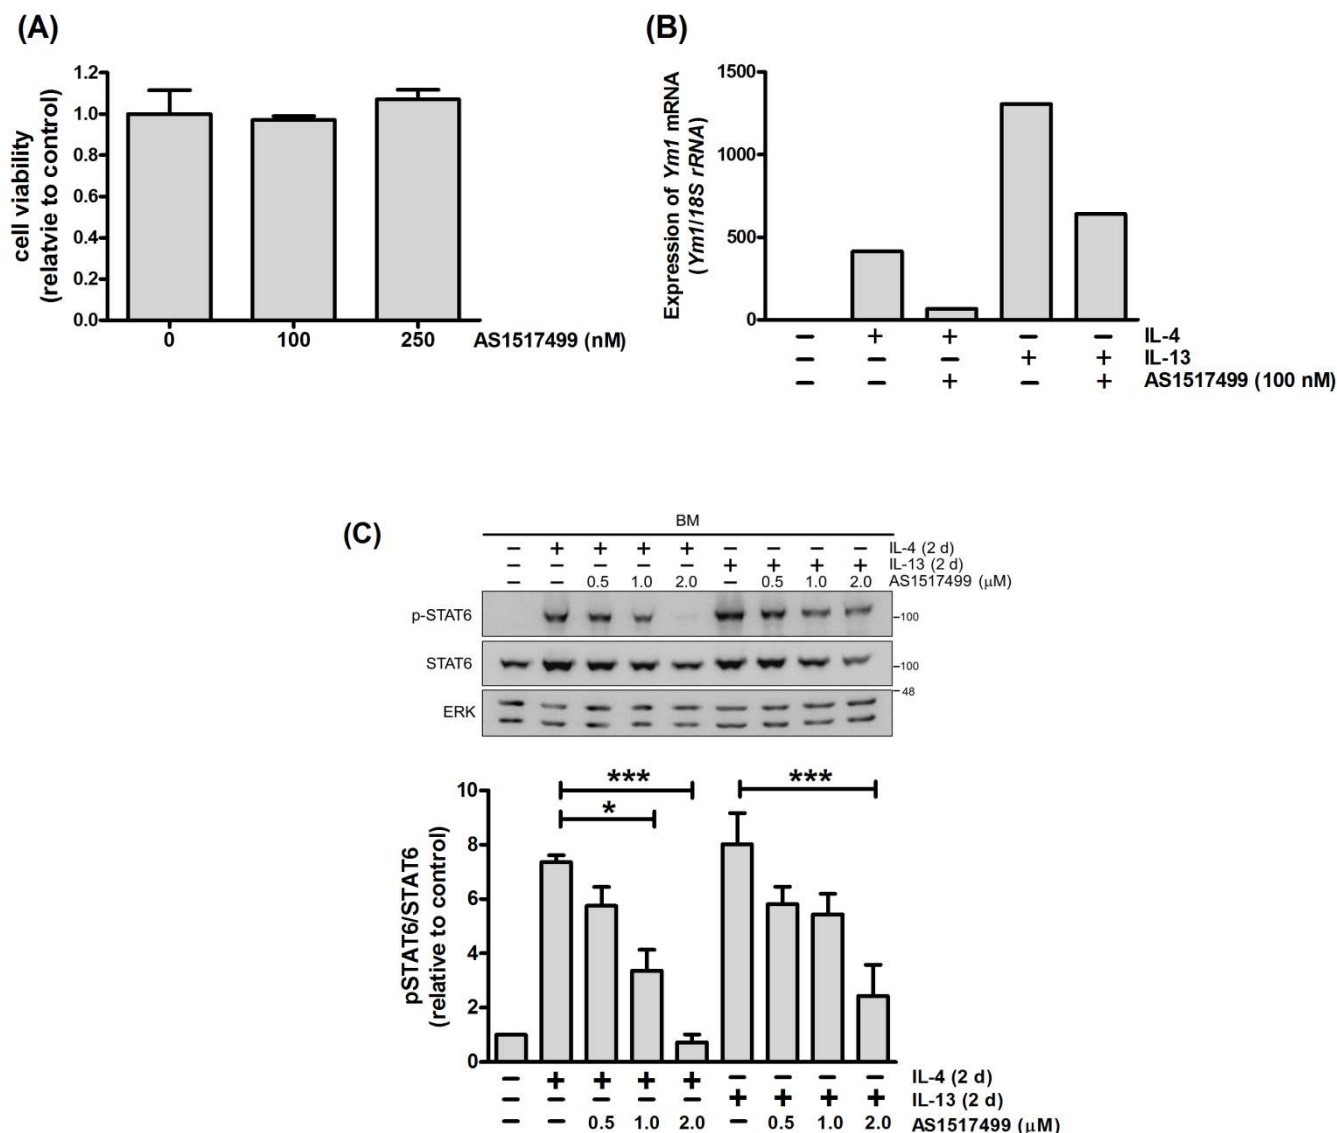

**Figure S1.** Effect of STAT6 inhibitor AS1517499 on cell viability, *Ym1* mRNA expression and STAT6 phosphorylation. **(A)** Mammary cells cultured on basement membrane (BM)-like matrix, Matrigel, were treated with AS1517499 (100, 250 nM) for 1 d. Cells were harvested and viable cells were counted. Data were expressed as fold change relative to control. **(B)** Cells were pretreated with AS1517499 (100 nM) for 1 h and stimulated with IL-4 or IL-13 for 16 h. Total RNA was subjected to real time RT-PCR with primers for *Ym1* and *18S rRNA*. *18S rRNA* was used as an internal control. Expression of *Ym1* mRNA were normalized to internal control and expressed as fold change relative to control sample. **(C)** Cells were pretreated with STAT6 inhibitor AS1517499 (0.5–2 μM) for 1 h and stimulated with IL-4 or IL-13 for 2 d. Total cell lysates were analyzed by immunoblotting with antibodies to phospho-STAT6 (p-STAT6), STAT6 and ERK. ERK was used as a loading control. Data were quantified, normalized to loading control and expressed as fold change (pSTAT6/STAT6) relative to control. \*  $p < 0.05$ , \*\*\*  $p < 0.005$ .

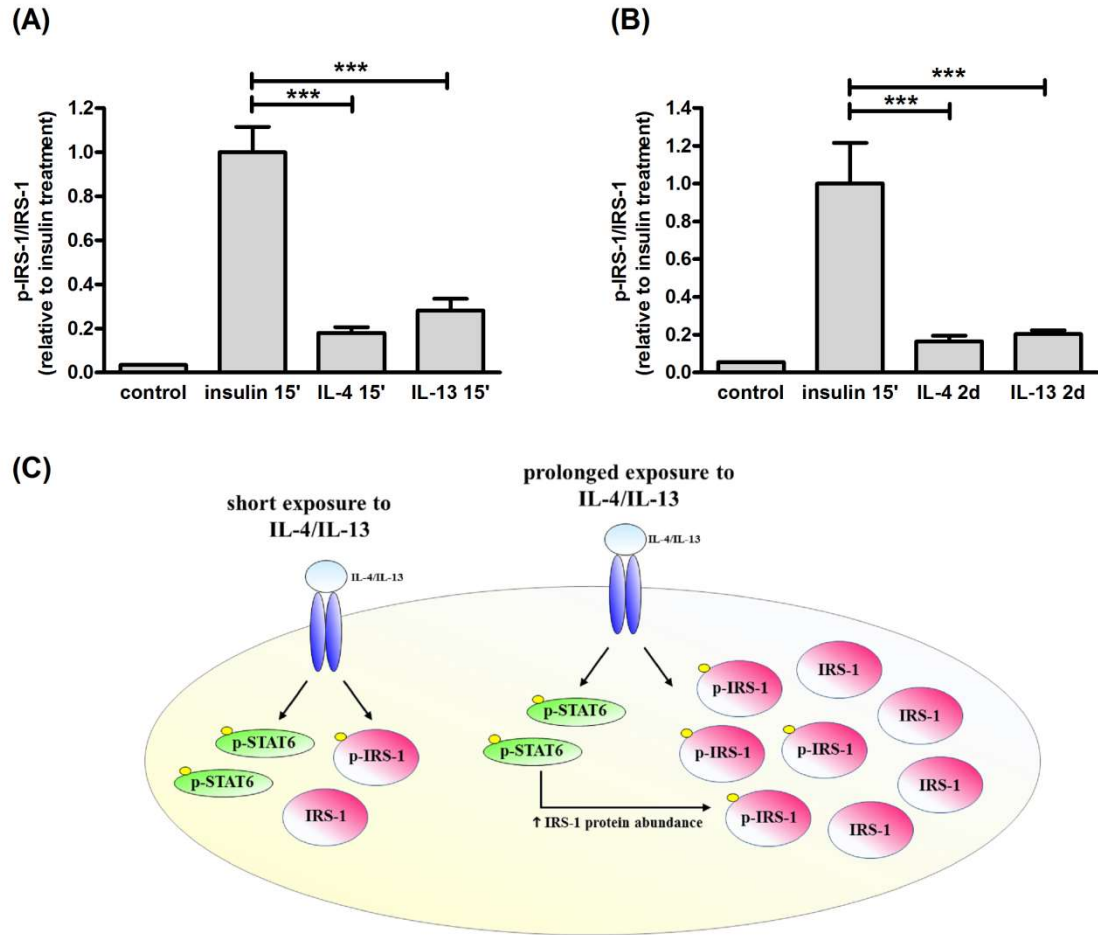

**Figure S2.** The ratio of IRS-1 tyrosine phosphorylation to IRS-1 expression (p-IRS-1/IRS-1) in figures 4A and 4B. (A, B) The ratios of IRS-1 tyrosine phosphorylation to IRS-1 expression (p-IRS-1/IRS-1) in figures 4A and 4B were calculated and expressed as fold change relative to insulin treatment. \*\*\*  $p < 0.005$ . (C) Summary diagram for results in A and B. Short exposure to IL-4/IL-13 leads to low levels of IRS-1 tyrosine phosphorylation. Prolonged cytokine treatment causes an increase in levels of IRS-1 tyrosine phosphorylation, due to enhanced IRS-1 protein abundance. In other words, prolonged treatment does not upregulate JAK activity, but substantially increases amounts of JAK substrate, IRS-1, to be phosphorylated. Yellow circles in the diagram indicate cytokine-stimulated tyrosine phosphorylation.

**Table S1. RNA-sequencing results.** Mammary cells cultured on Matrigel were untreated or treated with IL-4 or IL-13 for 12 h. Total RNA was subjected RNA-seq analysis.

|                | FPKM    |       |       |
|----------------|---------|-------|-------|
|                | Control | IL-4  | IL-13 |
| <i>Il4ra</i>   | 18.61   | 25.91 | 27.30 |
| <i>Il13ra1</i> | 18.96   | 18.84 | 18.98 |
| <i>Il13ra2</i> | 0.16    | 5.64  | 15.01 |
| <i>Irs1</i>    | 12.82   | 31.17 | 29.76 |
